# Supplementary material for: Nested whole-genome duplications coincide with diversification and high morphological disparity in Brassicaceae
Source: PubMed Central journal article supplement (PMC7393125; doi:10.1038/s41467-020-17605-7), 2020-07-30
Supplement: 41467_2020_17605_MOESM4_ESM.pdf [file 41467_2020_17605_MOESM4_ESM.pdf]

### **Description of Additional Supplementary Files**

File name: Supplementary Data 1

Description: detailed accession table with all respective information
